# Supplementary material
Source: Springer Nature journal article supplement (https://www.springermedizin.de/resource/supplementary/12876_2009_443_MOESM7_ESM.pdf/9437022)

Wild type  
TLR2<sup>-/-</sup>

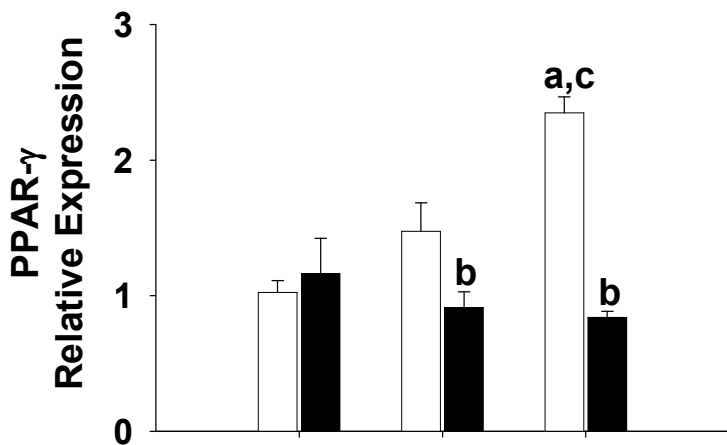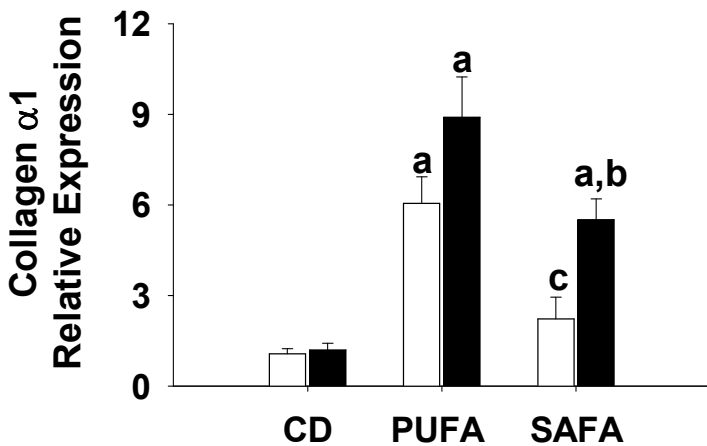

Supplement: MOESM7 [file 9437022]
